# Supplementary material for: p45NF-E2 represses Gcm1 in trophoblast cells to regulate syncytium formation, placental vascularization and embryonic growth
Source: Oxford University Press journal article supplement (doi:10.1242/dev.059105), 2011-05-10
Supplement: dev059105tables1.pdf [file dev059105tables1.pdf]

**Table S1. Embryonic and placental development**

| Gestational age (dpc) | <i>p45NF-E2</i> genotype | <i>n</i> | Embryonic length (mm) | Embryonic weight (mg) | Placental weight (mg) | Placental area (mm <sup>2</sup> ) |
|-----------------------|--------------------------|----------|-----------------------|-----------------------|-----------------------|-----------------------------------|
| 10.5                  | +/-                      | 30       | 5.0±0.01              | 26±3                  | 59±1                  | 74±1                              |
|                       | -/-                      | 37       | 5.1±0.01              | 26±2                  | 51±1                  | 74±1                              |
| 12.5                  | +/-                      | 40       | 8.9±0.02              | 114±4                 | 106±4                 | 202±2                             |
|                       | -/-                      | 36       | 8.8±0.02              | 110±6                 | 105±6                 | 203±4                             |
| 14.5                  | +/-                      | 64       | 11.1±0.02             | 305±5                 | 109±5                 | 204±5                             |
|                       | -/-                      | 70       | 11.3±0.03             | 306±4                 | 108±4                 | 205±3                             |
| 16.5                  | +/-                      | 27       | 16.6±0.01             | 665±9                 | 100±5                 | 173±5                             |
|                       | -/-                      | 32       | 15.9±0.02*            | 640±7*                | 101±7                 | 174±2                             |
| 17.5                  | +/-                      | 50       | 19.8±0.02             | 1003±9                | 101±3                 | 176±3                             |
|                       | -/-                      | 43       | 16.5±0.02**           | 911±8**               | 104±4                 | 174±4                             |

Embryonic length and weight as well as placental weight and area (embryonic aspect of the placenta) as a function of pregnancy duration. Mean ± s.e.m. \*,  $P < 0.05$ ; \*\*,  $P < 0.01$ ; ANOVA.
