# Supplementary figures and images for: p45NF-E2 represses Gcm1 in trophoblast cells to regulate syncytium formation, placental vascularization and embryonic growth
Source: Oxford University Press journal article supplement (doi:10.1242/dev.059105), 2011-05-10

**A**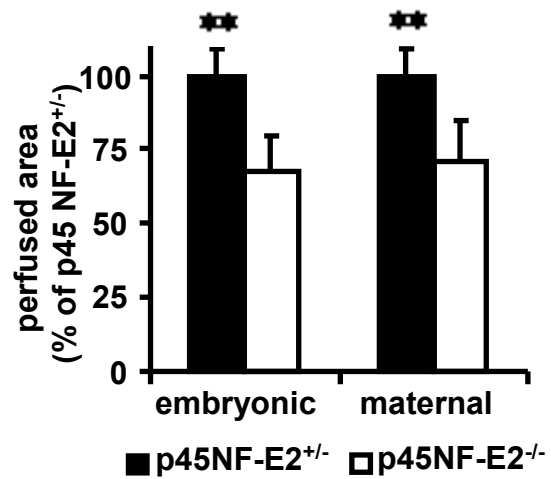**B**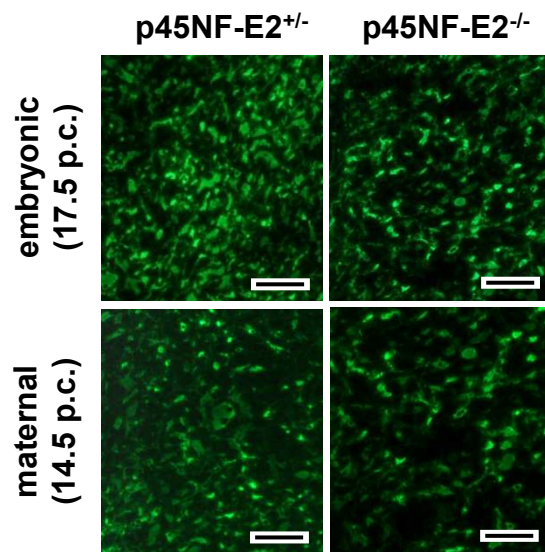

Supplement: dev059105figs1.pdf [file dev059105figs1.pdf]

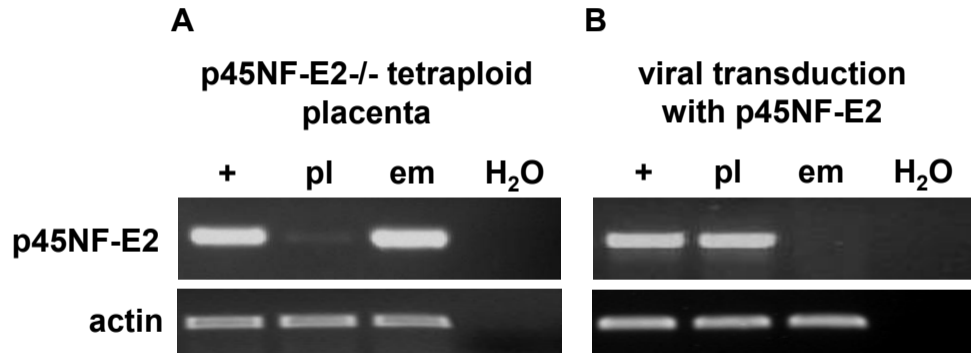

Supplement: dev059105figs2.pdf [file dev059105figs2.pdf]

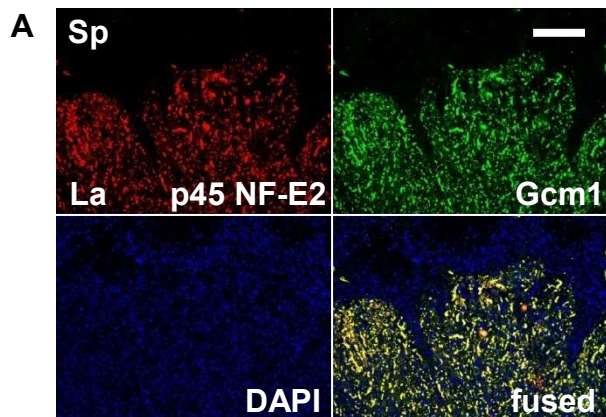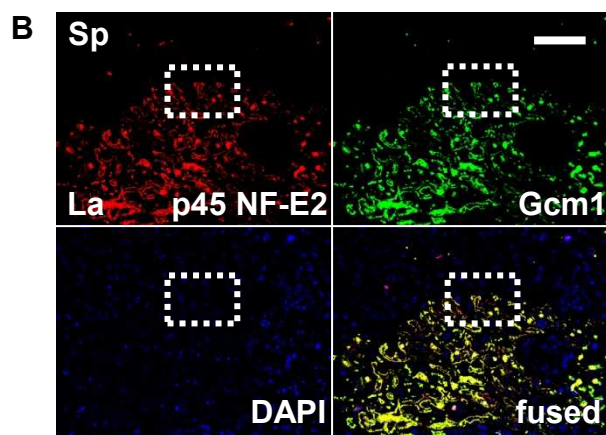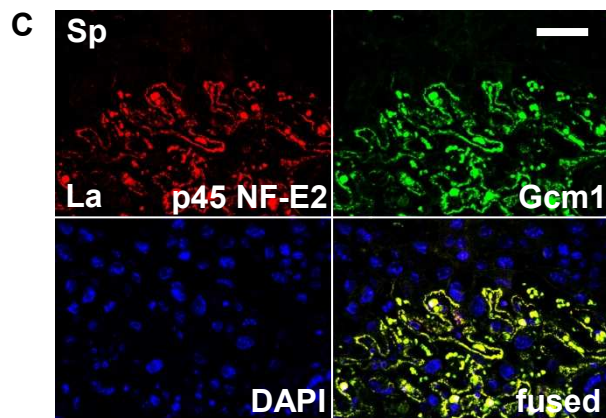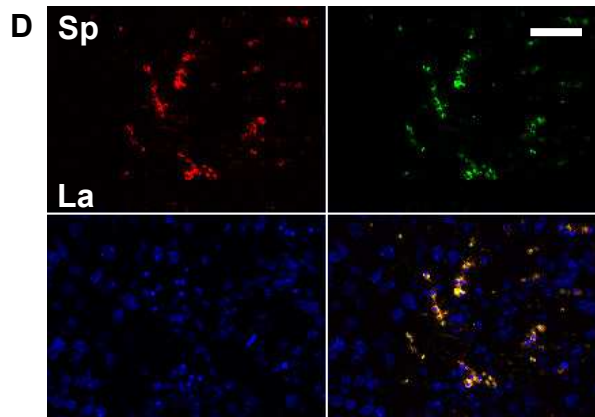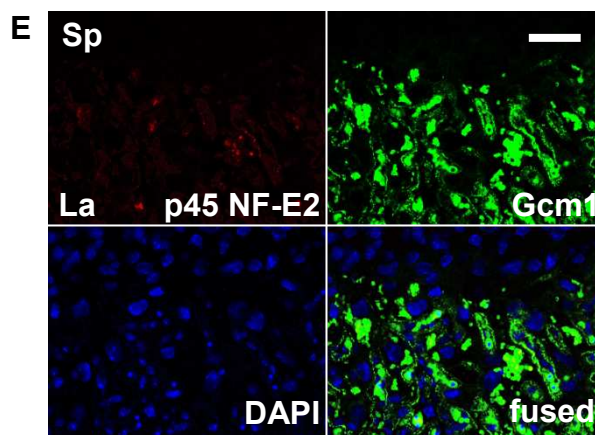

Supplement: dev059105figs3.pdf [file dev059105figs3.pdf]

**A**

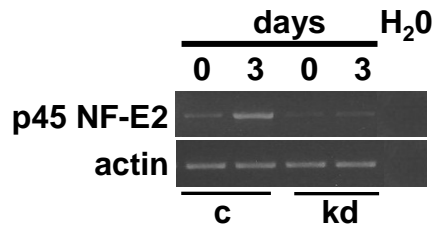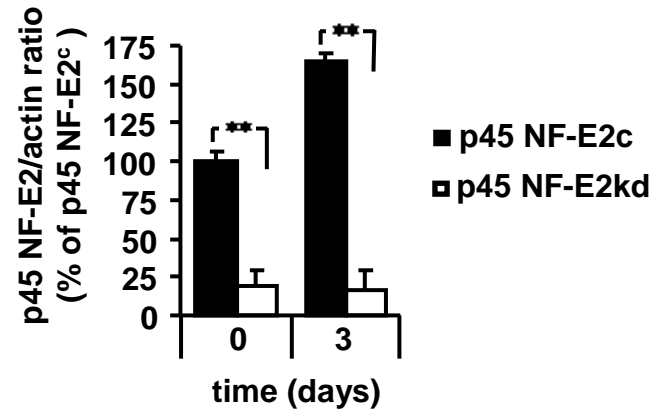

**B**

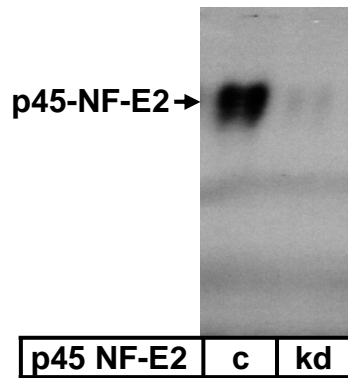

Supplement: dev059105figs4.pdf [file dev059105figs4.pdf]
